# Supplementary material
Source: PubMed Central journal article supplement (PMC3541873)
Supplement: mmc1.pdf [file mmc1.pdf]

study\_id  batch  abst\_dt   
 abstractor  BN  HK  CW  AG  MS  SP  \_

**PT INFO**

pt\_mrn  pt\_initials  (first last only)  
 pt\_dob  pt\_sex  1=M  2=F  
 pt\_race  1=White, Non-Hispanic  1=English  
 2=Hispanic or Latino  2=Spanish  
 3=Black or African American  3=Cantonese  
 4=Asian/Pacific Islander  4=Russian  
 5=American Indian  5=Other   
 8=Other   9=Unknown  
 9=Unknown

**CHIEF COMPLAINT**

cc\_type  1=dizzy, dizziness  2=vertigo, spinning  3=imbalance, disequilibrium *use complaint arrival field only*  
 cc\_prim  0=No  1=Yes  5=Maybe *Was dz/vt/etc the primary complaint?*  
 cc\_durtotal  days *durtotal=acute sx 9999 if not documented*  
 cc\_positional  0=No  1=Yes  9=NotDocu  
 cc\_acute  0=No  1=Yes  9=NotDocu  
 cc\_prior  0=No  1=Yes  9=NotDocu

**EXAM**

ex\_fever  0=No  1=Yes  9=NotDocu  
 ex\_sbp  ex\_dbp  ex\_hr   
 ex\_ortho  0=not orthostatic  1=orthostatic  9=not docu (clinical or SBP↓>20 or DBP↓>10)  

|               |                          |                          |                                                                                                           |
|---------------|--------------------------|--------------------------|-----------------------------------------------------------------------------------------------------------|
|               | ex_ed                    | ex_neuro                 | ex_staffed                                                                                                |
|               | <input type="checkbox"/> | <input type="checkbox"/> | <input type="radio"/> 0=No                                                                                |
|               |                          | 99=not obtained          | <input type="radio"/> 1=Yes                                                                               |
| ex_nonfocal   | <input type="checkbox"/> | <input type="checkbox"/> | <input type="radio"/> 9=N/A                                                                               |
| ex_enceph     | <input type="checkbox"/> | <input type="checkbox"/> |                                                                                                           |
| ex_aphasia    | <input type="checkbox"/> | <input type="checkbox"/> |                                                                                                           |
| ex_dysarthria | <input type="checkbox"/> | <input type="checkbox"/> | <i>Was neuro consult staffed by attending while patient still in ED? Mark N/A if no neuro consult was</i> |
| ex_nystag     | <input type="checkbox"/> | <input type="checkbox"/> |                                                                                                           |
| ex_ophthal    | <input type="checkbox"/> | <input type="checkbox"/> |                                                                                                           |
| ex_fieldcut   | <input type="checkbox"/> | <input type="checkbox"/> |                                                                                                           |
| ex_faceweak   | <input type="checkbox"/> | <input type="checkbox"/> |                                                                                                           |
| ex_limbweak   | <input type="checkbox"/> | <input type="checkbox"/> |                                                                                                           |
| ex_biweak     | <input type="checkbox"/> | <input type="checkbox"/> |                                                                                                           |
| ex_uniweak    | <input type="checkbox"/> | <input type="checkbox"/> |                                                                                                           |
| ex_limbataxia | <input type="checkbox"/> | <input type="checkbox"/> |                                                                                                           |
| ex_sensory    | <input type="checkbox"/> | <input type="checkbox"/> |                                                                                                           |
| ex_gait       | <input type="checkbox"/> | <input type="checkbox"/> |                                                                                                           |
| ex_irr        | <input type="checkbox"/> | <input type="checkbox"/> |                                                                                                           |
| ex_dhp        | <input type="checkbox"/> | <input type="checkbox"/> |                                                                                                           |
|               | <input type="checkbox"/> | <input type="checkbox"/> |                                                                                                           |
|               | <input type="checkbox"/> | <input type="checkbox"/> |                                                                                                           |

**VISIT INFO**

visit\_dt  visit\_tm   
 visit\_edattg *mm/dd/yy* *hh:mm (24h)*  
 01=Callaham  11=Nemer  21=Wang  
 02=Duong  12=Noble  22=Weber  
 03=Fee  13=Polevoi  23=West  
 04=Hardy  14=Promes  24=Whetsto  
 05=Harris  15=Ramanujam  25=  
 06=Kilian  16=Reynolds  
 07=Kwan  17=Richards  
 08=Lambe  18=Shochat  
 09=Lewin  19=Stein  
 10=Murphy  20=Teismann

**DOCU'D SYMPTOMS**

problems   
 sx\_uniweak  1=Yes  
 sx\_speech  1=Yes  
 sx\_gait  1=Yes  
 sx\_ha  1=Yes  
 sx\_tinnitus  1=Yes  
 sx\_hearloss  1=Yes  
 sx\_diplopia  1=Yes  
 sx\_vision  1=Yes  
 sx\_vertigo  1=Yes  
 sx\_confusion  1=Yes  
 sx\_sensory  1=Yes  
 sx\_nv  1=Yes  
 sx\_cp  1=Yes  
 sx\_uri  1=Yes  
 sx\_dyspnea  1=Yes  
 sx\_syncope  1=Yes  
 sx\_lighthead  1=Yes  
 sx\_psych  1=Yes  
*note any problems here and flag for discussion*

**DOCUMENTED RISK FACTORS**

rf\_migraine  0=No  1=Yes  9=NotDocu  
 rf\_trauma  0=No  1=Yes  
 rf\_htn  0=No  1=Yes  
 rf\_lipid  0=No  1=Yes  
 rf\_cad  0=No  1=Yes  
 rf\_dm  0=No  1=Yes  
 rf\_chf  0=No  1=Yes  
 rf\_stroke  0=No  1=Yes  
 rf\_tia  0=No  1=Yes  
 rf\_afib  0=No  1=Yes *or flutter*  
 rf\_cursmoke  0=No  1=Yes  
 rf\_drug  0=No  1=within 1 wk/Utox +  
 rf\_etoh  0=none/occ  
  1=acute (>4/d or BAC>100)  
  2=chronic (>14/wk)  
 rf\_psych  0=None  3=Personalit  
  1=Mood DO  9=Not Docu  
  2=Thought DO

**MEDS AT PRESENTATION**

m\_ap  0=No  1=Yes *antiplatelet*  
 m\_ac  0=No  1=Yes *anticoagulation*

study\_id

batch

### ED WORKUP

- t\_ekg  0=not obtained  4=2° or 3° HB  
 1=NSR  5=AFib/Flutter  
 2=Sinus tach  6=Other \_\_\_\_\_  
 3=ST Elevation/Depression or TWI

i\_ct\_ed  
i\_cta\_ed  
i\_mri\_ed  
i\_mra\_ed

only for studies ordered in the ED  
prior to any management decision

- 00=not obtained  
 01=obtained, relevant findings  
 02=obtained, no relevant findings
- 10=acute infarct  
 11=hemorrhage  
 12=demyelinating  
 13=tumor  
 14=infection  
 15=other \_\_\_\_\_ / \_\_\_\_\_
- 20=no stenoses  
 21=VB stenosis  
 22=carotid stenosis  
 23=intracranial stenosis

I\_wbc  I\_bun  I\_glu   
I\_hct  I\_cr  I\_trop   
I\_na  I\_other

- dispo\_ed  1=D/C Home  3=Admit Tele  5=Transfer  7=AMA  
 2=Admit ICU  4=Admit Ward  6=Died in ED

### ED TREATMENTS

- tx\_ed  1=anticholinergic *only for treatments initiated in the ED or prescribed from the ED for discharge*  
 2=antiemetic  
 3=Epley  
 4=benzo  
 5=antiplt  
 6=anticoag  
 7=none of the above

### DIAGNOSIS

- dx\_ed1  dx\_neuro1  dx\_final1
- 51=NEURO SERIOUS  
 01=ischemic stroke  
 02=ICH  
 03=TIA  
 04=SAH  
 05=SDH  
 06=Epidural hemorrhage  
 07=CNS neoplasm  
 08=demyelinating disease  
 09=seizure  
 11=brain abscess/meningitis
- 52=NEURO BENIGN  
 12=peripheral vertigo  
 13=BPPV  
 14=vestibular neuronitis/labyrinthitis  
 15=Ménière's disease
- 53=NEURO OTHER  
 16=concussion  
 17=migraine  
 18=gait d/o  
 19=orthostasis/presyncope  
 21=vasovagal syncope  
 22=dizziness NOS
- 23=psych d/o NOS
- 54=CARDIAC SERIOUS  
 24=arrhythmia  
 25=ACS  
 26=stable angina  
 27=CHF exacerbation  
 28=hypertensive encephalopathy/PRES
- 55=OTHER  
 29=drug/substance/toxin/withdrawal  
 30=hypoglycemia  
 31=electrolyte disorder  
 32=anemia/GIB  
 33=non-CNS infectious DO NOS  
 34=other

### WORKUP IN HOSPITAL (only for admitted pts)

- dispo\_serv  1=Medicine  4=Neurosurgery  
 2=Cardiology  5=Other \_\_\_\_\_  
 3=Neurology/Neurovascular

i\_ct\_hosp  
i\_cta\_hosp  
i\_mri\_hosp  
i\_mra\_hosp  
i\_ag\_hosp

only for studies ordered after decision  
to admit the patient

- 00=not obtained  
 01=obtained, relevant findings  
 02=obtained, no relevant findings
- 10=acute infarct  
 11=hemorrhage  
 12=demyelinating  
 13=tumor  
 14=infection  
 15=other \_\_\_\_\_ / \_\_\_\_\_
- 20=no stenoses  
 21=VB stenosis  
 22=carotid stenosis  
 23=intracranial stenosis
- dispo\_final  0=Home  
 1=Rehab  
 2=SNF  
 3=Other Hosp  
 4=Died

dispo\_adtdt  mm/dd/yy  
dispo\_dcddt  mm/dd/yy

entereddt1
